# Supplementary material for: Identifying Reproducible Molecular Biomarkers for Gastric Cancer Metastasis with the Aid of Recurrence Information
Source: PubMed Central journal article supplement (PMC4843012; doi:10.1038/srep24869), 2016-04-25
Supplement: srep24869-s1.pdf [file srep24869-s1.pdf]

**Identifying Reproducible Molecular Biomarkers for Gastric Cancer Metastasis with the Aid  
of Recurrence Information**

Mengyao Li, Guini Hong, Jun Cheng, Jing Li, Hao Cai, Xiangyu Li, Qingzhou Guan, Mengsha  
Tong, Hongdong Li, Zheng Guo

Contents

Supplementary Table 1

Supplementary Table 2

Supplementary Table 3

Supplementary Table 4

Supplementary Table 1. The concordance scores of DEGs from different datasets with samples grouped by TNM stage alone.

| Datasets                    | DEGs 1* | DEGs 2 | Overlap(CS) | <i>p</i> value |
|-----------------------------|---------|--------|-------------|----------------|
| GSE62254 vs. TCGA batch 220 | 1687    | 69     | 3(33.3%)    | 0.88           |
| GSE15459 vs. GSE62254       | 126     | 1687   | 7(57.1%)    | 0.5            |
| GSE15459 vs. TCGA batch 220 | 126     | 69     | 1(0%)       | >0.99          |

\* DEGs were identified with FDR<10% for all datasets.

Supplementary Table 2. The concordance scores of DEGs from different datasets with samples grouped by TNM stage alone.

| Datasets                    | DEGs 1* | DEGs 2 | Overlap(CS) | <i>p</i> value |
|-----------------------------|---------|--------|-------------|----------------|
| GSE62254 vs. TCGA batch 220 | 3371    | 124    | 15(33.3%)   | 0.94           |
| GSE15459 vs. GSE62254       | 660     | 3371   | 94(54.3%)   | 0.24           |
| GSE15459 vs. TCGA batch 220 | 660     | 124    | 3(0%)       | >0.99          |

\* DEGs were identified with FDR<20% for all datasets.

Supplementary Table 3. The DEGs and concordance scores of samples regrouped by TNM stage and recurrence information .

| Datasets                    | DEGs 1* | DEGs 2 | Overlap(CS) | <i>p</i> value          |
|-----------------------------|---------|--------|-------------|-------------------------|
| GSE62254 vs. TCGA batch 220 | 6731    | 7074   | 2827(92.9%) | $<2.20 \times 10^{-16}$ |
| GSE15459 vs. GSE62254       | 68      | 6731   | 21(90.5%)   | $1.11 \times 10^{-4}$   |
| GSE15459 vs. TCGA batch 220 | 68      | 7074   | 13(92.3%)   | $1.71 \times 10^{-3}$   |

\* DEGs were identified with FDR<20% for all datasets.

Supplementary Table 4. Significant pathways enriched with DEGs identified consistently in GSE62254 and TCGA batch 220 (FDR<0.2).

| KEGG_Pathway_ID                           | KEGG_Pathway_Name                       | N    | n   | m   | k  | Adjusted <i>p</i>     |
|-------------------------------------------|-----------------------------------------|------|-----|-----|----|-----------------------|
| Pathways enriched from up-regulated genes |                                         |      |     |     |    |                       |
| hsa04512                                  | ECM-receptor interaction                | 5573 | 344 | 87  | 21 | $3.85 \times 10^{-8}$ |
| hsa04270                                  | Vascular smooth muscle contraction      | 5573 | 344 | 116 | 24 | $9.93 \times 10^{-8}$ |
| hsa04510                                  | Focal adhesion                          | 5573 | 344 | 206 | 32 | $8.37 \times 10^{-7}$ |
| hsa04022                                  | cGMP-PKG signalling pathway             | 5573 | 344 | 163 | 27 | $1.77 \times 10^{-6}$ |
| hsa04360                                  | Axon guidance                           | 5573 | 344 | 126 | 22 | $6.90 \times 10^{-6}$ |
| hsa04971                                  | Gastric acid secretion                  | 5573 | 344 | 74  | 14 | $1.37 \times 10^{-4}$ |
| hsa04921                                  | Oxytocin signalling pathway             | 5573 | 344 | 154 | 21 | $4.48 \times 10^{-4}$ |
| hsa04261                                  | Adrenergic signalling in cardiomyocytes | 5573 | 344 | 146 | 19 | $1.47 \times 10^{-3}$ |

|          |                                   |      |     |     |    |                       |
|----------|-----------------------------------|------|-----|-----|----|-----------------------|
| hsa04911 | Insulin secretion                 | 5573 | 344 | 83  | 13 | $1.55 \times 10^{-3}$ |
| hsa04713 | Circadian entrainment             | 5573 | 344 | 95  | 14 | $1.88 \times 10^{-3}$ |
| hsa00982 | Drug metabolism - cytochrome P450 | 5573 | 344 | 49  | 9  | $2.66 \times 10^{-3}$ |
| hsa04020 | Calcium signalling pathway        | 5573 | 344 | 178 | 21 | $2.92 \times 10^{-3}$ |
| hsa04730 | Long-term depression              | 5573 | 344 | 56  | 9  | $6.72 \times 10^{-3}$ |
| hsa04710 | Circadian rhythm                  | 5573 | 344 | 29  | 6  | $7.49 \times 10^{-3}$ |

Pathways enriched from down-regulated genes

|          |                                           |      |     |     |    |                        |
|----------|-------------------------------------------|------|-----|-----|----|------------------------|
| hsa04110 | Cell cycle                                | 5573 | 570 | 123 | 46 | $4.44 \times 10^{-16}$ |
| hsa03030 | DNA replication                           | 5573 | 570 | 36  | 21 | $1.45 \times 10^{-12}$ |
| hsa03040 | Spliceosome                               | 5573 | 570 | 124 | 40 | $9.87 \times 10^{-12}$ |
| hsa00970 | Aminoacyl-tRNA biosynthesis               | 5573 | 570 | 44  | 19 | $1.39 \times 10^{-8}$  |
| hsa03430 | Mismatch repair                           | 5573 | 570 | 22  | 12 | $2.89 \times 10^{-7}$  |
| hsa03008 | Ribosome biogenesis in eukaryotes         | 5573 | 570 | 74  | 22 | $2.40 \times 10^{-6}$  |
| hsa03460 | Fanconi anemia pathway                    | 5573 | 570 | 49  | 17 | $3.29 \times 10^{-6}$  |
| hsa03013 | RNA transport                             | 5573 | 570 | 148 | 32 | $2.68 \times 10^{-5}$  |
| hsa03010 | Ribosome                                  | 5573 | 570 | 122 | 28 | $2.72 \times 10^{-5}$  |
| hsa00240 | Pyrimidine metabolism                     | 5573 | 570 | 97  | 24 | $2.76 \times 10^{-5}$  |
| hsa01200 | Carbon metabolism                         | 5573 | 570 | 104 | 25 | $3.20 \times 10^{-5}$  |
| hsa03050 | Proteasome                                | 5573 | 570 | 43  | 14 | $5.50 \times 10^{-5}$  |
| hsa04115 | p53 signalling pathway                    | 5573 | 570 | 68  | 18 | $1.09 \times 10^{-4}$  |
| hsa03420 | Nucleotide excision repair                | 5573 | 570 | 42  | 13 | $1.81 \times 10^{-4}$  |
| hsa03018 | RNA degradation                           | 5573 | 570 | 73  | 18 | $2.89 \times 10^{-4}$  |
| hsa00670 | One carbon pool by folate                 | 5573 | 570 | 19  | 8  | $3.10 \times 10^{-4}$  |
| hsa04114 | Oocyte meiosis                            | 5573 | 570 | 107 | 23 | $3.94 \times 10^{-4}$  |
| hsa03410 | Base excision repair                      | 5573 | 570 | 33  | 10 | $1.21 \times 10^{-3}$  |
| hsa04623 | Cytosolic DNA-sensing pathway             | 5573 | 570 | 60  | 14 | $2.36 \times 10^{-3}$  |
| hsa04621 | NOD-like receptor signalling pathway      | 5573 | 570 | 57  | 13 | $4.13 \times 10^{-3}$  |
| hsa04914 | Progesterone-mediated oocyte maturation   | 5573 | 570 | 84  | 17 | $4.28 \times 10^{-3}$  |
| hsa00190 | Oxidative phosphorylation                 | 5573 | 570 | 113 | 21 | $4.65 \times 10^{-3}$  |
| hsa01230 | Biosynthesis of amino acids               | 5573 | 570 | 71  | 15 | $4.66 \times 10^{-3}$  |
| hsa03440 | Homologous recombination                  | 5573 | 570 | 28  | 8  | $5.55 \times 10^{-3}$  |
| hsa00620 | Pyruvate metabolism                       | 5573 | 570 | 42  | 10 | $8.29 \times 10^{-3}$  |
| hsa00020 | Citrate cycle (TCA cycle)                 | 5573 | 570 | 30  | 8  | $8.70 \times 10^{-3}$  |
| hsa04650 | Natural killer cell mediated cytotoxicity | 5573 | 570 | 113 | 20 | $9.82 \times 10^{-3}$  |
| hsa00010 | Glycolysis / Gluconeogenesis              | 5573 | 570 | 65  | 13 | $1.30 \times 10^{-2}$  |
| hsa00061 | Fatty acid biosynthesis                   | 5573 | 570 | 6   | 3  | $1.68 \times 10^{-2}$  |
| hsa04612 | Antigen processing and presentation       | 5573 | 570 | 56  | 11 | $2.43 \times 10^{-2}$  |
| hsa00630 | Glyoxylate and dicarboxylate metabolism   | 5573 | 570 | 23  | 6  | $2.47 \times 10^{-2}$  |

Note:

N: number of background genes; n: number of interesting genes; m: number of background genes in a pathway; k: number of interesting in a pathway;  $p$ : adjusted hypergeometric  $p$ -value.
